# Supplementary material for: Higher Protein Intakes Predict Leaner Body Composition in Weight-Loss Participants—Findings from the International Weight Control Registry
Source: Research Square preprint supplement (doi:10.21203/rs.3.rs-7915933/v1), 2025-11-24
Supplement: Supplementary file 1 [file 6ec95598e178ee657225a698.pdf]

**Supplemental Table 1.** Results of regression analyses examining associations of total EAA and leucine intake with body weight and composition (n=195).

| Predictor                            | Estimate | BMI          |        | p | Estimate | %BF          |        | p | Estimate | % Muscle    |        | p |
|--------------------------------------|----------|--------------|--------|---|----------|--------------|--------|---|----------|-------------|--------|---|
|                                      |          | 95% CI       |        |   |          | 95% CI       |        |   |          | 95% CI      |        |   |
| <u>Main Effects:</u>                 |          |              |        |   |          |              |        |   |          |             |        |   |
| EAA intake, mg/kg BW/day             | -0.45    | -0.57, -0.34 | <0.001 |   | -0.34    | -0.45, -0.22 | <0.001 |   | 0.24     | 0.18, 0.31  | <0.001 |   |
| Average daily steps                  | -0.32    | -0.44, -0.21 | <0.001 |   | -0.24    | -0.36, -0.13 | <0.001 |   | 0.17     | 0.10, 0.24  | <0.001 |   |
| <u>Interaction:</u>                  |          |              |        |   |          |              |        |   |          |             |        |   |
| EAA intake x Average daily steps     | 0.08     | -0.03, 0.18  | 0.159  |   | 0.029    | -0.08, 0.13  | 0.591  |   | -0.06    | 0.12, 0.01  | 0.078  |   |
| <u>Main Effects:</u>                 |          |              |        |   |          |              |        |   |          |             |        |   |
| Leucine intake, mg/kg BW/day         | -0.46    | -0.58, -0.35 | <0.001 |   | -0.34    | -0.45, -0.22 | <0.001 |   | 0.25     | 0.18, 0.31  | <0.001 |   |
| Average daily steps                  | -0.32    | -0.43, -0.20 | <0.001 |   | -0.25    | -0.36, -0.13 | <0.001 |   | 0.17     | 0.10, 0.24  | <0.001 |   |
| <u>Interaction:</u>                  |          |              |        |   |          |              |        |   |          |             |        |   |
| Leucine intake x Average daily steps | 0.09     | -0.02, 0.20  | 0.098  |   | 0.03     | -0.08, 0.13  | 0.625  |   | -0.06    | -0.12, 0.01 | 0.083  |   |

**Model (EAA):** Outcomes (BMI/% BF/% Muscle) = EAA intake (mg/kg BW/day) + Average daily step count + covariates (age and sex)

**Model (Leucine):** Outcomes (BMI/% BF/% Muscle) = Leucine intake (mg/kg BW/day) + Average daily step count + covariates (age and sex)

Continuous variables were mean-centered and scaled for analysis.

One outlier was removed from the analysis.

For interaction results,  $p < 0.1$  for significance.

**Abbreviation:** EAA = essential amino acid; BW = body weight; d = day; BMI = body mass index; % BF = percent body fat; % Muscle = percent muscle mass calculated relative to body weight; CI = confidence interval.

**Supplemental Table 2.** Predicted marginal slopes between measures of EAA intake and body composition measures across values for average daily step count. Estimates were derived from models with observed significant interactions between EAA intake and average daily steps.

| Marginal Slope Effect                   | Average steps/day (PA category)       | Estimate | 95% CI         | <i>p</i> |
|-----------------------------------------|---------------------------------------|----------|----------------|----------|
| Total EAA intake (g/kg BW/d) - % Muscle | 5,000 steps/day (Physically inactive) | 0.274    | 0.196, 0.351   | < 0.001  |
|                                         | 7,500 steps/day (Moderately active)   | 0.229    | 0.161, 0.297   | < 0.001  |
|                                         | 10,000 steps/day (Physically active)  | 0.191    | 0.105, 0.277   | < 0.001  |
|                                         | 12,000 steps/day (Very active)        | 0.164    | 0.057, 0.271   | 0.0028   |
| Leucine intake (g/kg BW/d) - BMI        | 5,000 steps/day (Physically inactive) | -0.513   | -0.648, -0.377 | < 0.001  |
|                                         | 7,500 steps/day (Moderately active)   | -0.441   | -0.559, -0.323 | < 0.001  |
|                                         | 10,000 steps/day (Physically active)  | -0.380   | -0.526, -0.234 | < 0.001  |
|                                         | 12,000 steps/day (Very active)        | -0.337   | -0.518, -0.155 | < 0.001  |
| Leucine intake (g/kg BW/d) - % Muscle   | 5,000 steps/day (Physically inactive) | 0.276    | 0.199, 0.353   | < 0.001  |
|                                         | 7,500 steps/day (Moderately active)   | 0.233    | 0.165, 0.301   | < 0.001  |
|                                         | 10,000 steps/day (Physically active)  | 0.197    | 0.113, 0.281   | < 0.001  |
|                                         | 12,000 steps/day (Very active)        | 0.171    | 0.066, 0.275   | 0.0015   |

**Abbreviation:** BW = body weight; d = day; BMI = body mass index; CI = confidence interval; % BF = percent body fat; % Muscle = percent muscle mass calculated relative to body weight; CI = confidence interval; EAA = essential amino acids; PA = physical activity.
